# Supplementary material for: A genotyping assay to determine geographic origin and transmission potential of Plasmodium falciparum malaria cases
Source: PubMed Central journal article supplement (PMC8484479; doi:10.1038/s42003-021-02667-0), 2021-09-30
Supplement: 42003_2021_2667_MOESM2_ESM.pdf [file 42003_2021_2667_MOESM2_ESM.pdf]

## Description of Additional Supplementary Files

**File name:** Supplementary Data 1.

**Description:** Geographic origin of *Plasmodium falciparum* Pfs47 sequences analyzed and Single Nucleotide Polymorphism (SNP) altern allele frequency.

**File name:** Supplementary Data 2.

**Description:** Fixation index ( $F_{ST}$ ) of Pfs47 Single Nucleotide Polymorphisms between geographic regions.

**File name:** Supplementary Data 3.

**Description:** Source and ID of *Plasmodium falciparum* samples analyzed.
